# Supplementary material for: Utility of long read Nanopore sequencing as a tool for rapid insight into the host response in patients infected with SARS-CoV-2 or influenza A virus at point-of-care
Source: Research Square preprint supplement (doi:10.21203/rs.3.rs-7300653/v1), 2025-08-11

**Supplementary Figures**

**Supplementary Figure 1:** Library size comparison between Nanopore and Illumina sequencing, presented at the individual level – showing moderate correlation between normalised transcript expression levels.
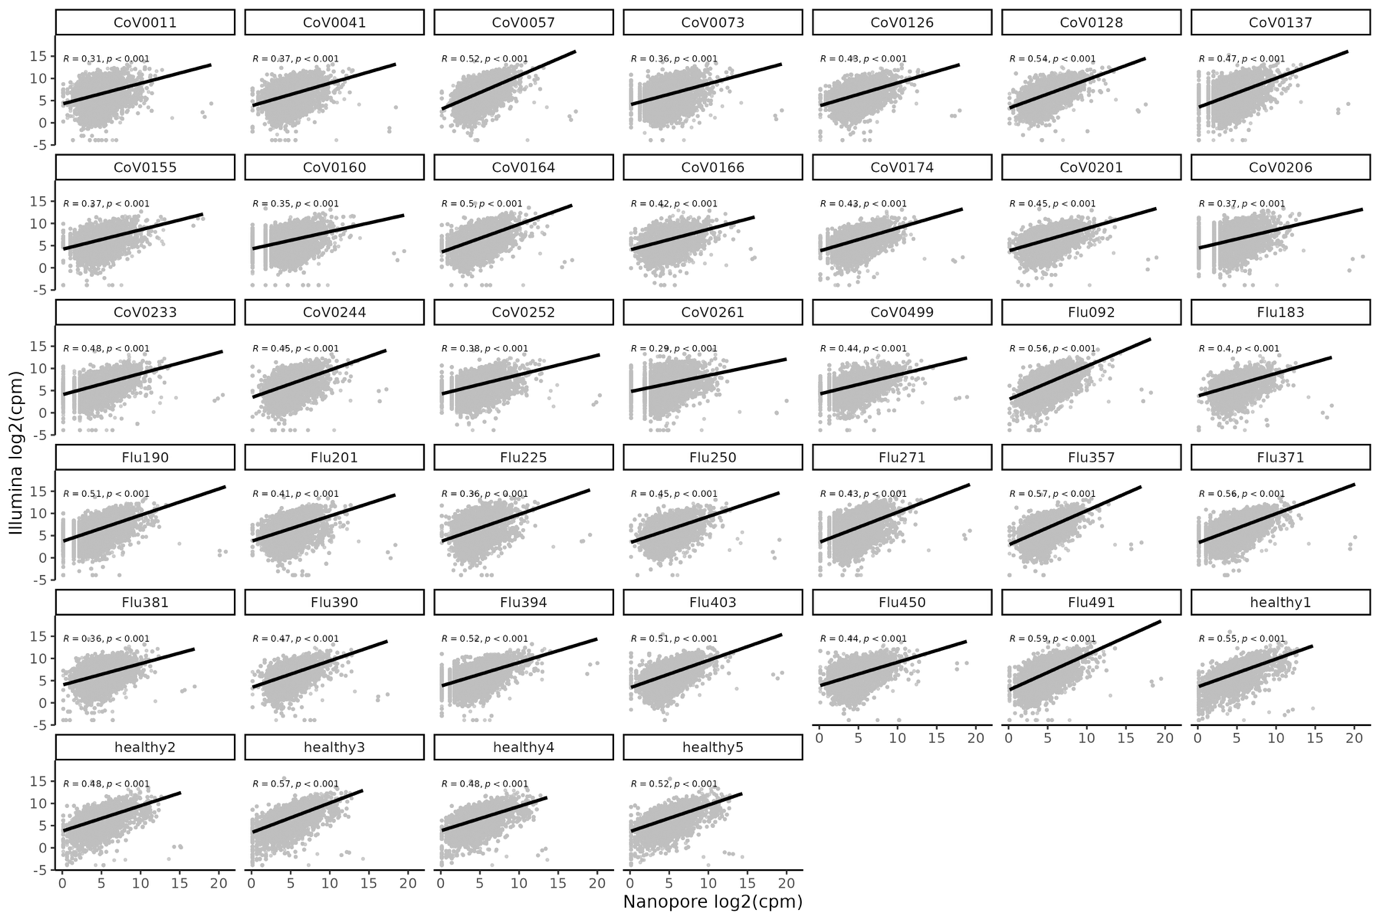

Supplement: Supplementary file 1 [file 324a260251d96abdc2714437.docx]
