# Supplementary material for: Utility of long read Nanopore sequencing as a tool for rapid insight into the host response in patients infected with SARS-CoV-2 or influenza A virus at point-of-care
Source: Research Square preprint supplement (doi:10.21203/rs.3.rs-7300653/v1), 2025-08-11
Supplement: Supplementary file 2 [file 325e4c5a94424cd8cbc52388.docx]

**Supplementary Tables**

**Supplementary Table 1:** Characteristics of healthy participants.

| Participant | Age | Sex |
| --- | --- | --- |
| Donor 1 | 29 | Male |
| Donor 2 | 36 | Female |
| Donor 3 | 26 | Male |
| Donor 4 | 36 | Male |
| Donor 5 | 30 | Male |

**Supplementary Table 2:** Characteristics, comorbidities and outcomes of patients infected with SARS-CoV-2.

| **Variable** | **N** | **N = 20**1 |
| --- | --- | --- |
| symptom duration days | 20 |  |
| Median (IQR) |  | 8 (5, 12) |
| los | 20 |  |
| Median (IQR) |  | 184 (115, 235) |
| age | 20 |  |
| Median (IQR) |  | 72 (67, 77) |
| sex | 20 |  |
| F |  | 8 (40%) |
| M |  | 12 (60%) |
| smoking status | 20 |  |
| Ex-smoker |  | 9 (45%) |
| Never |  | 8 (40%) |
| Unknown |  | 2 (10%) |
| Yes |  | 1 (5.0%) |
| ethnicity | 20 |  |
| A |  | 17 (85%) |
| C |  | 1 (5.0%) |
| L |  | 1 (5.0%) |
| N |  | 1 (5.0%) |
| htn | 20 |  |
| No |  | 9 (45%) |
| Unknown |  | 1 (5.0%) |
| Yes |  | 10 (50%) |
| cv disease | 20 |  |
| No |  | 12 (60%) |
| Unknown |  | 1 (5.0%) |
| Yes |  | 7 (35%) |
| resp disease other | 20 |  |
| No |  | 13 (65%) |
| Unknown |  | 1 (5.0%) |
| Yes |  | 6 (30%) |
| asthma | 20 |  |
| No |  | 17 (85%) |
| Unknown |  | 1 (5.0%) |
| Yes |  | 2 (10%) |
| copd | 20 |  |
| No |  | 16 (80%) |
| Unknown |  | 1 (5.0%) |
| Yes |  | 3 (15%) |
| ckd | 20 |  |
| No |  | 17 (85%) |
| Unknown |  | 1 (5.0%) |
| Yes |  | 2 (10%) |
| cld | 20 |  |
| No |  | 19 (95%) |
| Unknown |  | 1 (5.0%) |
| diabetes | 20 |  |
| No |  | 12 (60%) |
| Unknown |  | 1 (5.0%) |
| Yes |  | 7 (35%) |
| active malignancy | 20 |  |
| No |  | 15 (75%) |
| Unknown |  | 1 (5.0%) |
| Yes |  | 4 (20%) |
| dementia | 20 |  |
| No |  | 18 (90%) |
| Unknown |  | 1 (5.0%) |
| Yes |  | 1 (5.0%) |
| immunosuppressed | 20 |  |
| No |  | 17 (85%) |
| Unknown |  | 1 (5.0%) |
| Yes |  | 2 (10%) |
| hb | 20 |  |
| Median (IQR) |  | 135 (125, 150) |
| wbc | 20 |  |
| Median (IQR) |  | 8.4 (6.8, 11.9) |
| plt | 20 |  |
| Median (IQR) |  | 232 (176, 276) |
| neut | 20 |  |
| Median (IQR) |  | 6.90 (5.07, 8.72) |
| lym | 20 |  |
| Median (IQR) |  | 0.80 (0.68, 1.03) |
| na | 20 |  |
| Median (IQR) |  | 134 (133, 136) |
| k | 18 |  |
| Median (IQR) |  | 3.80 (3.53, 3.98) |
| ur | 20 |  |
| Median (IQR) |  | 7.9 (5.6, 9.6) |
| creat | 20 |  |
| Median (IQR) |  | 91 (68, 129) |
| alb | 18 |  |
| Median (IQR) |  | 34 (31, 34) |
| bili | 18 |  |
| Median (IQR) |  | 9 (8, 13) |
| alt | 18 |  |
| Median (IQR) |  | 36 (22, 52) |
| alp | 18 |  |
| Median (IQR) |  | 74 (56, 96) |
| tot prot | 18 |  |
| Median (IQR) |  | 70 (66, 72) |
| ldh | 13 |  |
| Median (IQR) |  | 693 (518, 850) |
| ferr | 16 |  |
| Median (IQR) |  | 592 (280, 930) |
| d dimer | 14 |  |
| Median (IQR) |  | 428 (308, 808) |
| trop | 18 |  |
| Median (IQR) |  | 16 (8, 52) |
| crp | 20 |  |
| Median (IQR) |  | 108 (48, 140) |
| il 6 pg m l | 19 |  |
| Median (IQR) |  | 66 (35, 132) |
| tn fa pg m l | 19 |  |
| Median (IQR) |  | 20 (16, 25) |
| il 8 pg m l | 19 |  |
| Median (IQR) |  | 49 (30, 68) |
| il 1b 9 pg m l | 19 |  |
| Median (IQR) |  | 0.46 (0.29, 0.62) |
| gm csf pg m l | 19 |  |
| Median (IQR) |  | 1.6 (0.9, 3.2) |
| if ng pg m l | 19 |  |
| Median (IQR) |  | 9 (2, 13) |
| il 10 pg m l | 19 |  |
| Median (IQR) |  | 22 (13, 31) |
| il 33 pg m l | 19 |  |
| Median (IQR) |  | 0.32 (0.14, 0.59) |
| hr | 20 |  |
| Median (IQR) |  | 94 (85, 106) |
| sbp | 20 |  |
| Median (IQR) |  | 128 (120, 146) |
| rr | 20 |  |
| Median (IQR) |  | 24 (21, 30) |
| sats | 20 |  |
| Median (IQR) |  | 95 (92, 96) |
| temp | 20 |  |
| Median (IQR) |  | 36.85 (36.60, 38.12) |
| o2 | 20 | 9 (45%) |
| news2 | 20 |  |
| Median (IQR) |  | 5 (4, 6) |
| consolidation or infiltrates | 20 | 15 (75%) |
| duration o2 | 20 |  |
| Median (IQR) |  | 18 (6, 69) |
| gicu admission | 20 |  |
| 0 |  | 14 (70%) |
| 1 |  | 6 (30%) |
| died within 30 days | 19 |  |
| 0 |  | 11 (58%) |
| 1 |  | 8 (42%) |
| 1 n (%) | | |

**Supplementary Table 3:** Characteristics, comorbidities and outcomes of patients infected with IAV.

| Variable | N | N = 151 |
| --- | --- | --- |
| age years | 15 |  |
| Median (IQR) |  | 45 (38, 68) |
| sex | 15 |  |
| F |  | 4 (27%) |
| M |  | 11 (73%) |
| los days | 15 |  |
| Median (IQR) |  | 3.7 (1.5, 4.6) |
| current smoker | 15 | 6 (40%) |
| influenza vaccine | 15 | 5 (33%) |
| ethnicity | 15 |  |
| Other |  | 1 (6.7%) |
| Other white |  | 1 (6.7%) |
| White British |  | 13 (87%) |
| maximum duration of symptoms days | 15 |  |
| Median (IQR) |  | 4.00 (3.50, 5.50) |
| pulse rate bpm | 15 |  |
| Median (IQR) |  | 94 (85, 110) |
| systolic bp mm hg | 15 |  |
| Median (IQR) |  | 123 (102, 134) |
| diastolic bp mm hg | 15 |  |
| Median (IQR) |  | 66 (60, 73) |
| resp rate bpm | 15 |  |
| Median (IQR) |  | 24.0 (16.5, 25.0) |
| temp c | 15 |  |
| Median (IQR) |  | 37.50 (36.70, 37.90) |
| x o2 sats | 14 |  |
| Median (IQR) |  | 95.00 (93.25, 96.75) |
| supplementary o2 on admission | 15 | 3 (20%) |
| news2 on admission | 14 |  |
| Median (IQR) |  | 4 (2, 7) |
| antibiotics 14 days prior | 15 | 4 (27%) |
| antivirals 14 d prior | 15 | 1 (6.7%) |
| htn | 15 | 3 (20%) |
| cvd | 15 | 2 (13%) |
| respiratory | 15 | 7 (47%) |
| renal disease | 15 | 1 (6.7%) |
| diabetes mellitus | 15 | 2 (13%) |
| immunosupression | 15 | 1 (6.7%) |
| charlson co morbid score | 15 |  |
| Median (IQR) |  | 4 (0, 4) |
| antibiotics used y n | 15 | 14 (93%) |
| agent | 13 |  |
| oseltamivir |  | 13 (100%) |
| crp | 14 |  |
| Median (IQR) |  | 118 (55, 182) |
| wcc | 15 |  |
| Median (IQR) |  | 8.2 (7.0, 11.2) |
| neuts | 15 |  |
| Median (IQR) |  | 7.2 (5.6, 9.8) |
| lymp | 15 |  |
| Median (IQR) |  | 0.80 (0.65, 1.05) |
| report key finding first cxr | 15 |  |
| Consolidation/ pulmonary infiltrates |  | 5 (33%) |
| nil acute |  | 8 (53%) |
| other |  | 2 (13%) |
| final diagnosis | 15 |  |
| Asthma exacerbation |  | 2 (13%) |
| COPD exacerbation |  | 1 (6.7%) |
| Influenza-like illness |  | 5 (33%) |
| NPLRTI |  | 1 (6.7%) |
| Pneumonia |  | 6 (40%) |
| 1 n (%) | | |

**Supplementary Table 4:** CAMERA geneset enrichment results ordered by Nanopore and Illumina gene scores (COVID-19 cohort vs Healthy cohort)

| gene_set | nr_genes_illumina | dir_illumina | pval_illumina | nr_genes_nanopore | dir_nanopore | pval_nanopore | Rank |
| --- | --- | --- | --- | --- | --- | --- | --- |
| G protein-coupled receptor signaling pathway | 418 | -1 | 3.27e-07 | NA | NA | NA | Illumina |
| cell adhesion | 389 | -1 | 6.48e-04 | NA | NA | NA | Illumina |
| nervous system development | 337 | -1 | 2.26e-05 | 93 | -1 | 0.0376 | Illumina |
| DNA damage response | 283 | 1 | 3.28e-03 | NA | NA | NA | Illumina |
| adaptive immune response | 280 | 1 | 2.68e-02 | NA | NA | NA | Illumina |
| proteasome-mediated ubiquitin-dependent protein catabolic process | 268 | 1 | 3.47e-02 | NA | NA | NA | Illumina |
| DNA repair | 241 | 1 | 6.02e-03 | NA | NA | NA | Illumina |
| regulation of cell cycle | 214 | 1 | 3.97e-02 | NA | NA | NA | Illumina |
| protein stabilization | 204 | 1 | 1.54e-03 | NA | NA | NA | Illumina |
| mRNA processing | 181 | 1 | 1.19e-03 | NA | NA | NA | Illumina |
| translation | 166 | 1 | 4.45e-28 | 143 | 1 | 3.40e-20 | Nanopore |
| mRNA splicing, via spliceosome | 176 | 1 | 2.02e-09 | 143 | 1 | 2.27e-04 | Nanopore |
| proton transmembrane transport | 152 | 1 | 4.63e-03 | 105 | 1 | 5.06e-03 | Nanopore |
| protein folding | 139 | 1 | 4.34e-04 | 97 | 1 | 9.39e-03 | Nanopore |
| nervous system development | 337 | -1 | 2.26e-05 | 93 | -1 | 3.76e-02 | Nanopore |
| cytoplasmic translation | 88 | 1 | 9.46e-52 | 88 | 1 | 6.58e-31 | Nanopore |
| rRNA processing | 116 | 1 | 1.06e-10 | 86 | 1 | 5.75e-07 | Nanopore |
| mitochondrial translation | 93 | 1 | 1.94e-09 | 83 | 1 | 1.56e-03 | Nanopore |
| defense response to bacterium | 100 | -1 | 1.54e-02 | 65 | -1 | 6.49e-03 | Nanopore |
| proton motive force-driven mitochondrial ATP synthesis | 63 | 1 | 6.16e-08 | 63 | 1 | 2.37e-05 | Nanopore |

**Supplementary Table 5:** CAMERA geneset enrichment results ordered by Nanopore and Illumina gene scores (IAV cohort versus Healthy cohort)

| gene_set | nr_genes_illumina | dir_illumina | pval_illumina | nr_genes_nanopore | dir_nanopore | pval_nanopore | Rank |
| --- | --- | --- | --- | --- | --- | --- | --- |
| G protein-coupled receptor signaling pathway | 438 | -1 | 6.28e-07 | NA | NA | NA | Illumina |
| cell adhesion | 404 | -1 | 9.13e-04 | NA | NA | NA | Illumina |
| nervous system development | 352 | -1 | 2.75e-05 | 118 | -1 | 6.71e-03 | Illumina |
| DNA damage response | 287 | 1 | 4.66e-03 | NA | NA | NA | Illumina |
| adaptive immune response | 282 | 1 | 8.95e-03 | NA | NA | NA | Illumina |
| DNA repair | 242 | 1 | 5.77e-03 | NA | NA | NA | Illumina |
| regulation of cell cycle | 217 | 1 | 4.25e-02 | NA | NA | NA | Illumina |
| protein stabilization | 206 | 1 | 1.06e-03 | NA | NA | NA | Illumina |
| mRNA processing | 183 | 1 | 2.82e-03 | NA | NA | NA | Illumina |
| mRNA splicing, via spliceosome | 178 | 1 | 9.53e-09 | 157 | 1 | 5.28e-05 | Illumina |
| mRNA splicing, via spliceosome | 178 | 1 | 9.53e-09 | 157 | 1 | 5.28e-05 | Nanopore |
| translation | 166 | 1 | 5.15e-37 | 152 | 1 | 7.37e-29 | Nanopore |
| nervous system development | 352 | -1 | 2.75e-05 | 118 | -1 | 6.71e-03 | Nanopore |
| proton transmembrane transport | 153 | 1 | 4.45e-03 | 118 | 1 | 4.41e-04 | Nanopore |
| protein folding | 140 | 1 | 3.39e-04 | 105 | 1 | 1.71e-03 | Nanopore |
| rRNA processing | 116 | 1 | 7.55e-12 | 93 | 1 | 2.85e-09 | Nanopore |
| mitochondrial translation | 93 | 1 | 2.59e-10 | 91 | 1 | 4.01e-05 | Nanopore |
| cytoplasmic translation | 88 | 1 | 6.98e-71 | 88 | 1 | 5.53e-47 | Nanopore |
| defense response to bacterium | 100 | -1 | 1.46e-02 | 72 | -1 | 4.70e-03 | Nanopore |
| proton motive force-driven mitochondrial ATP synthesis | 63 | 1 | 1.55e-08 | 63 | 1 | 1.44e-08 | Nanopore |
